# Supplementary material
Source: PubMed Central journal article supplement (PMC6537831)
Supplement: jamafacialplastsurg-21-191-s001.pdf [file jamafacialplastsurg-21-191-s001.pdf]

## Supplementary Online Content

McGuire C, Nurmsoo S, Samargandi OA, Bezuhly M. Role of tranexamic acid in reducing intraoperative blood loss and postoperative edema and ecchymosis in primary elective rhinoplasty: a systematic review and meta-analysis. *JAMA Facial Plast Surg*. Published online January 3, 2019. doi:10.1001/jamafacial.2018.1737

### **eTable.** Cochrane Collaboration Risk of Bias Tool

This supplementary material has been provided by the authors to give readers additional information about their work.

**eTable.** Cochrane Collaboration Risk of Bias Tool<sup>1</sup>

| Domain                                                  | High Risk of Bias                                                                                                     | Low Risk of Bias                                                                             | Unclear Risk of Bias                                                                                                                                                                                               | Reviewer Assessment   |
|---------------------------------------------------------|-----------------------------------------------------------------------------------------------------------------------|----------------------------------------------------------------------------------------------|--------------------------------------------------------------------------------------------------------------------------------------------------------------------------------------------------------------------|-----------------------|
| Selection bias- Random sequence generation              | Selection bias (biased allocation to interventions) due to inadequate generation of a randomized sequence.            | Random sequence generation method should produce comparable results.                         | Not described in sufficient detail.                                                                                                                                                                                | High, low or unclear. |
| Selection bias- Allocation concealment                  | Selection bias (biased allocation to interventions) due to inadequate concealment of allocations prior to assignment. | Intervention allocations likely could not have been foreseen in before or during enrollment. | Not described in sufficient detail.                                                                                                                                                                                | High, low or unclear. |
| Reporting bias- Selective reporting                     | Reporting bias due to selective outcome reporting.                                                                    | Selective outcome reporting bias not detected.                                               | Insufficient information to permit judgment.                                                                                                                                                                       | High, low or unclear. |
| Other sources of bias                                   | Bias not covered elsewhere in the table.                                                                              | No other bias detected.                                                                      | There may be a risk of bias, but there is either insufficient information to assess whether an important risk of bias exists or insufficient rationale or evidence that an identified problem will introduce bias. | High, low or unclear. |
| Performance bias- Blinding (participants and personnel) | Performance bias due to knowledge of the allocated interventions by participants and personnel during the study.      | Blinding was likely effective.                                                               | Not described in sufficient detail.                                                                                                                                                                                | High, low or unclear. |
| Detection bias- Blinding (outcome assessment)           | Detection bias due to knowledge of the allocated interventions by outcome assessors.                                  | Blinding was likely effective.                                                               | Not described in sufficient detail.                                                                                                                                                                                | High, low or unclear. |
| Attrition bias- Incomplete                              | Attrition bias due to amount, or                                                                                      | Handling of incomplete                                                                       | Insufficient reporting of attrition/exclusions to                                                                                                                                                                  | High, low or unclear. |

|              |                                                |                                                               |                                                                                             |  |
|--------------|------------------------------------------------|---------------------------------------------------------------|---------------------------------------------------------------------------------------------|--|
| outcome data | nature of handling of incomplete outcome data. | outcome data was complete and unlikely to have produced bias. | permit judgment (e.g., number randomized not states, no reasons for missing data provided). |  |
|--------------|------------------------------------------------|---------------------------------------------------------------|---------------------------------------------------------------------------------------------|--|

Reference

1. Higgins JP, Altman DG, Gøtzsche PC, et al; Cochrane Bias Methods Group; Cochrane Statistical Methods Group. The Cochrane Collaboration's tool for assessing risk of bias in randomised trials. *BMJ*. 2011;343:d5928. Medline:22008217 doi:10.1136/bmj.d5928
